# Supplementary material
Source: PubMed Central journal article supplement (PMC3831670)
Supplement: pro0022-1552-SD1.pdf [file pro0022-1552-SD1.pdf]

- 1) Kaleidoscope marker
- 2) HMGB1b – 12 kD
- 3) HMGB1b/R26A – 12kD
- 4) Histone H1 – 21 kD
- 5) Kaleidoscope marker

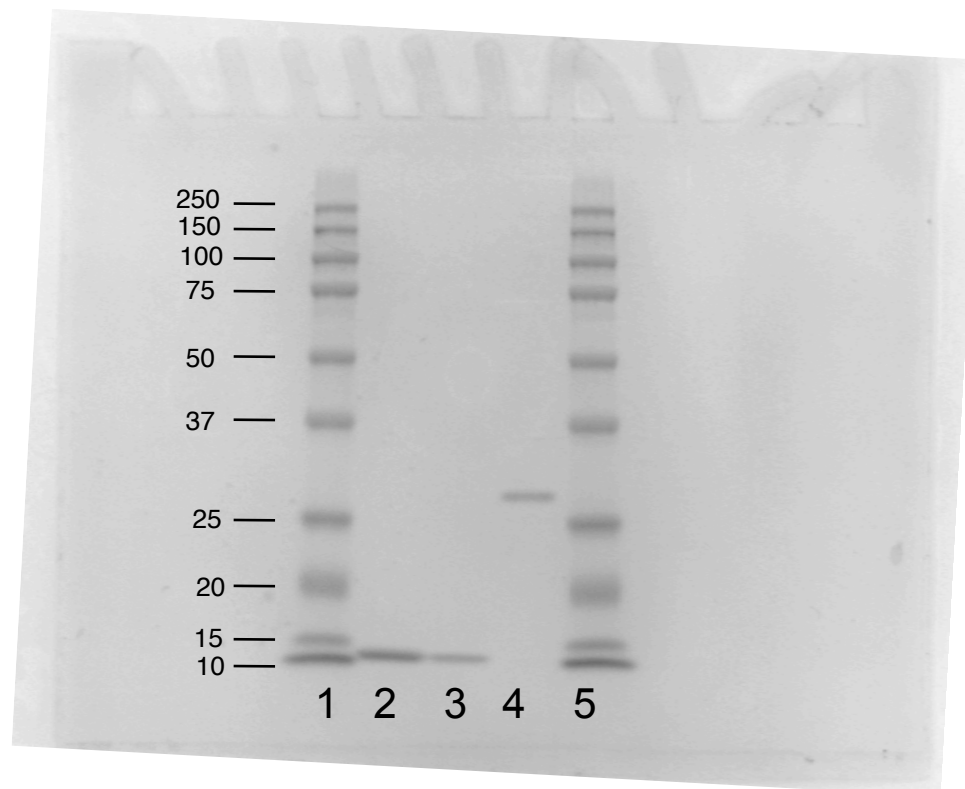

**Figure 1:** 12% SDS gel of HMGB1b, HMGB1b/R26A and histone H1. 1X TGX buffer run at ~125V for 1 hour. Lanes 1 and 5 contain BioRad Kaleidoscope marker. Lanes 2, 3, and 4 contain approximately 10  $\mu$ M of each HMGB1b, HMGB1b/R26A and histone H1.

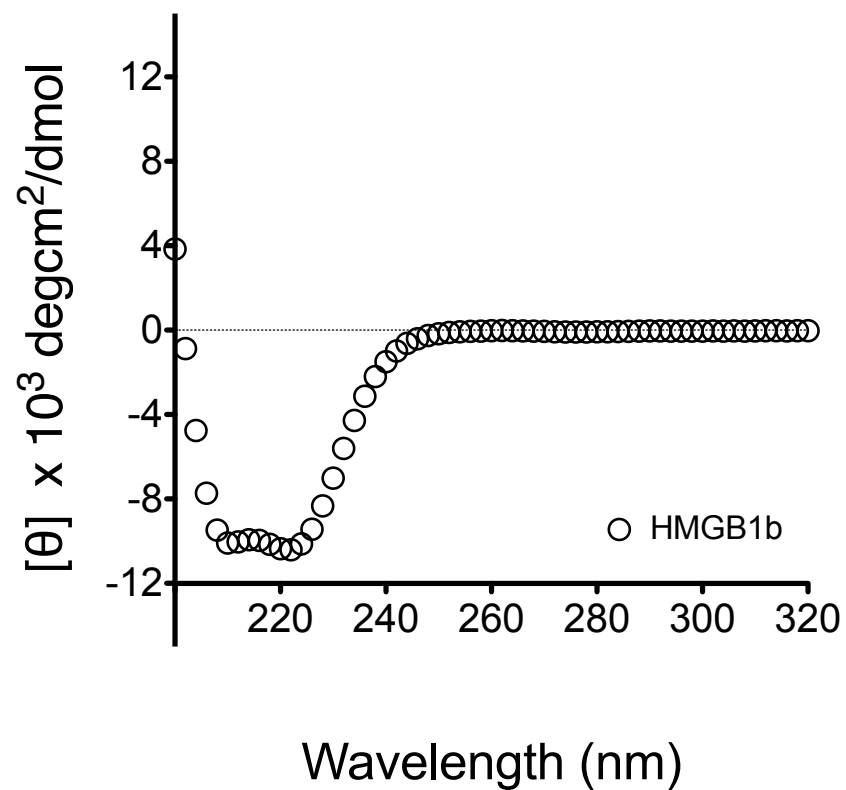

**Figure 2:** CD scan of 10  $\mu\text{M}$  HMGB1b in the absence of four-way junctions. CD analysis buffer: 20 mM HEPES, 30 mM  $\text{NH}_4\text{Cl}$ , 200 mM KCl, 1 mM  $\text{MgCl}_2$ , 2 mM DTT and 10% glycerol. Triplicate analysis.

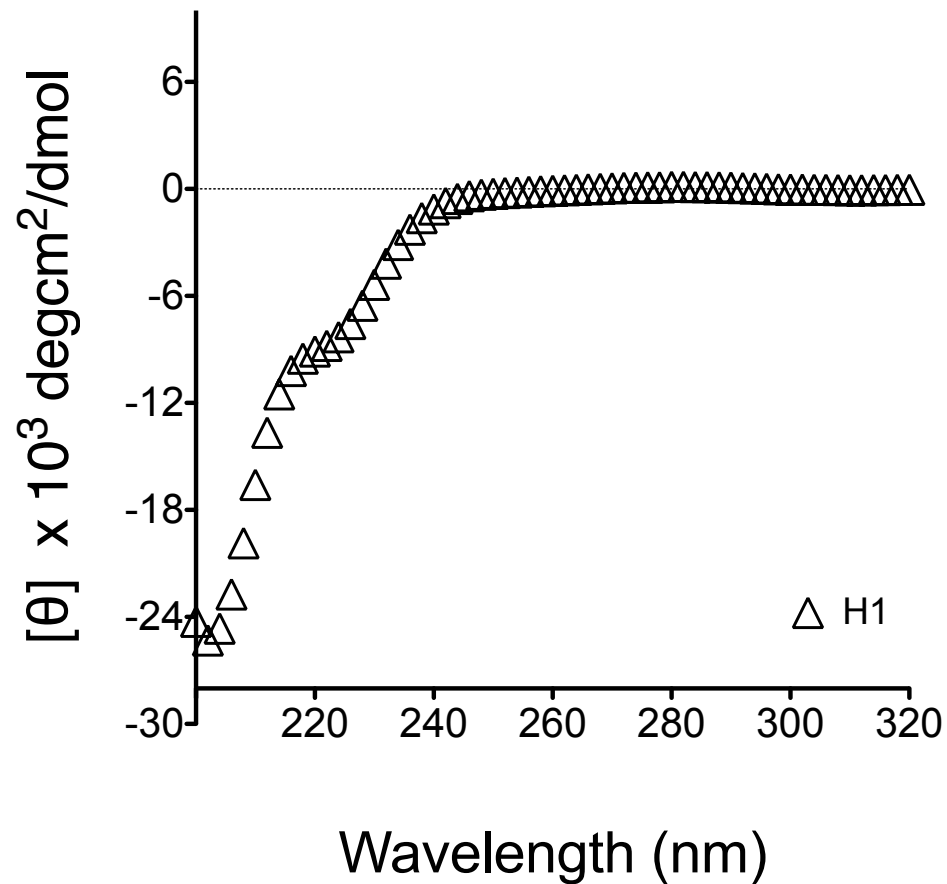

**Figure 3:** CD scan of 10  $\mu\text{M}$  Histone H1 in the absence of four-way junctions. CD analysis buffer: 20 mM HEPES, 30 mM  $\text{NH}_4\text{Cl}$ , 200 mM KCl, 1 mM  $\text{MgCl}_2$ , 2 mM DTT and 10% glycerol. Triplicate analysis.

Comment 1 PNA-1 junction  
Comment 2

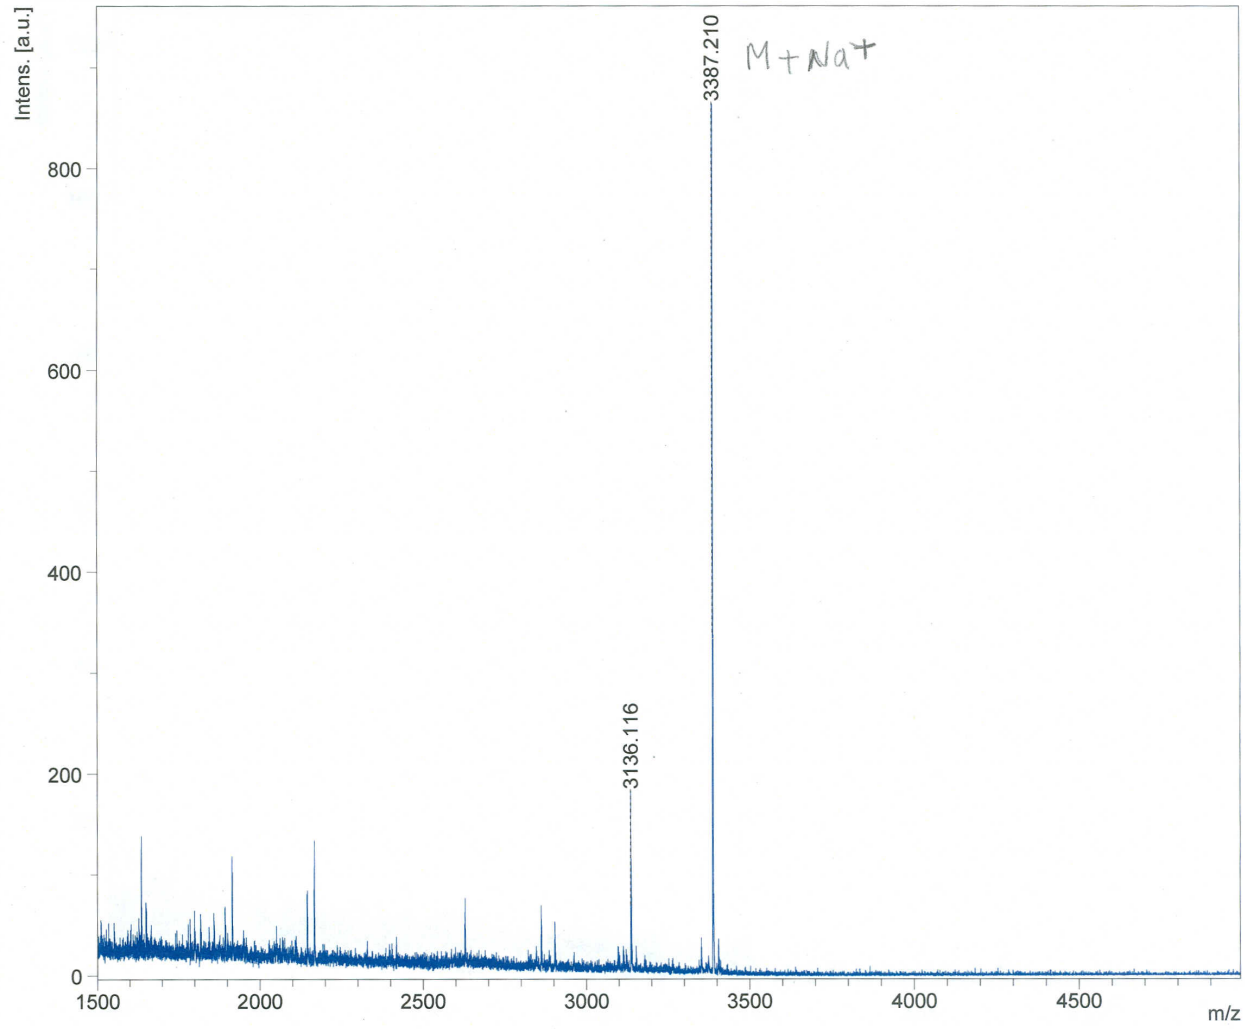

**Figure 4:** MALDI-MS of PNA1 indicating sample purity.  
**PNA1:** H-CAATCCTGAGCA-K-NH<sub>2</sub> (MW = 3364.4); found m/z = 3387.21 (M+Na<sup>+</sup>)

Comment 1 PNA-2 junction

Comment 2

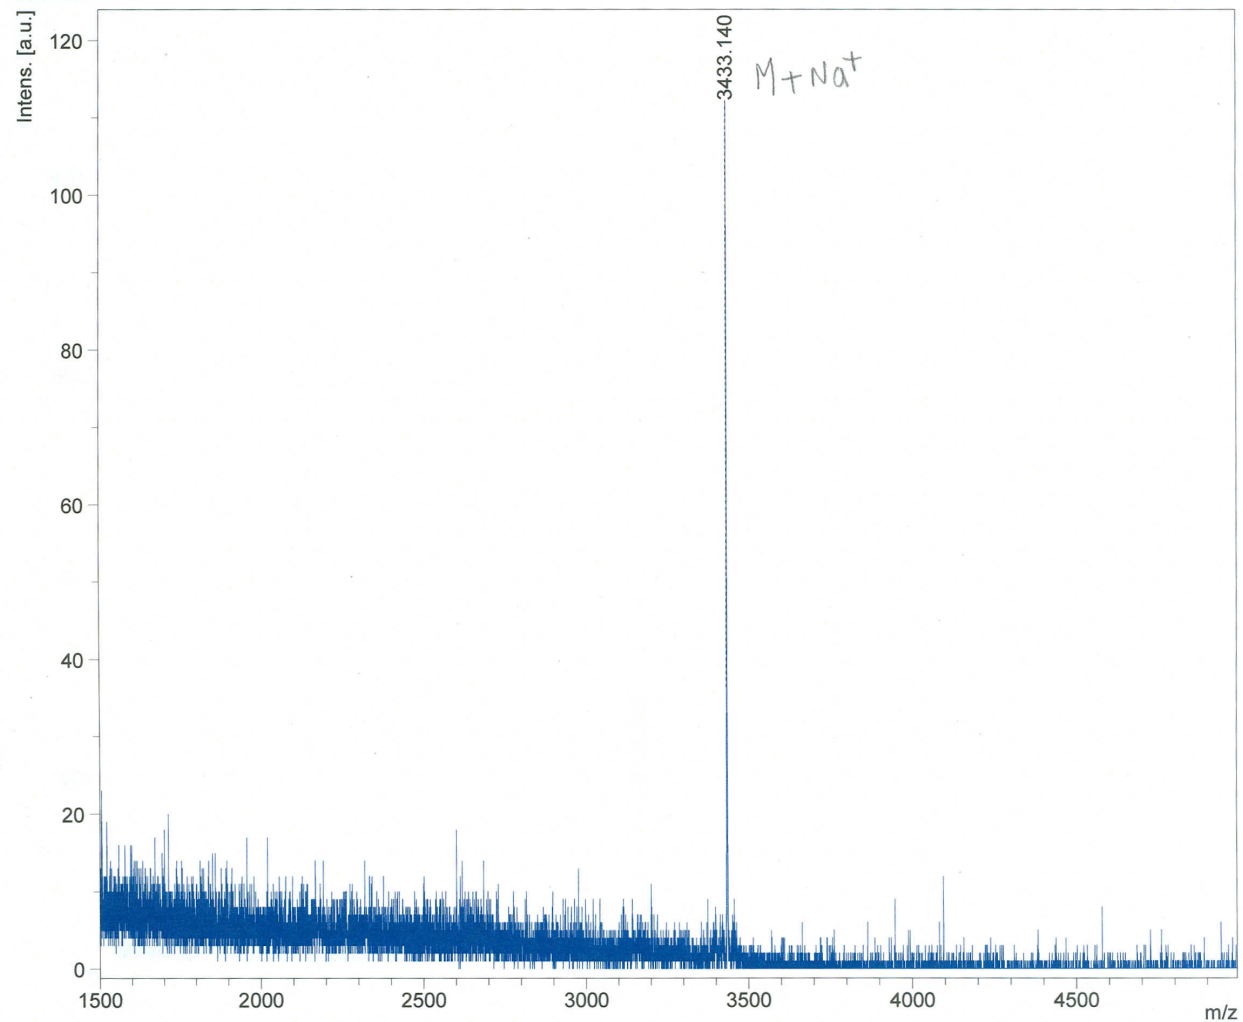

**Figure 5:** MALDI-MS of PNAs indicating sample purity.

**PNA3:** H-ATTCGGACTATG-K-NH<sub>2</sub> (MW = 3410.4); found m/z = 3433.14 (M+Na<sup>+</sup>)

Junctions 50 nM

- 1) 101 (ss control)
- 2) J1
- 3) 4WJ-PNA<sub>1</sub>
- 4) 4WJ-PNA<sub>3</sub>
- 5) J1

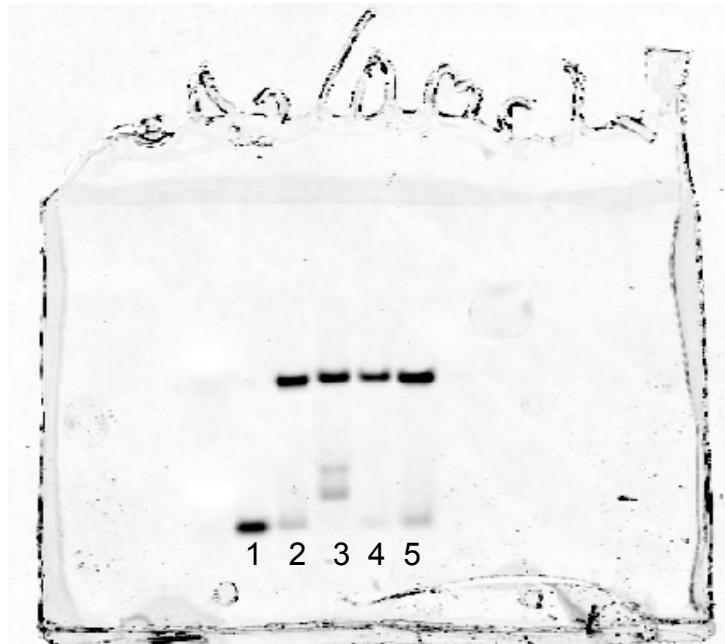

**Figure 6:** Native PAGE gel indicating sample purity of four-way junctions (50 nM). EMSAs were run using a buffer composed of 0.5 X TBE•MgCl<sub>2</sub> buffer (45 mM Trisma, 45 mM boric acid, 1.0 mM EDTA and 1 mM MgCl<sub>2</sub>), pH 8.0, at 4°C for 2 – 3 hours.
